# Supplementary material for: Circular economy and ecologically sustainable behaviour in the light of financial constraints: quantitative results from Austria
Source: Frontiers journal article supplement (doi:10.3389/frsus.2025.1570573), 2025-04-25
Supplement: Table_1.docx [file Table_1.docx]

**Supplement**

**Table A.1 – Log Reg. – Reduce**

|  | **Strategy: Reduce** | | | |
| --- | --- | --- | --- | --- |
|  | **OR - clothes** | **OR - e. devices** | **OR - furniture** | **OR - toys** |
| Make ends meet (ref. Rather/very easy) |  |  |  |  |
| (some/great) difficulties | 1,078 | 0,95 | 1,054 | 1,32 |
| Willingness (ref. rather disagree) |  |  |  |  |
| neither | **2,535**** | **3,086**** | **3,577**** | **3,261**** |
| rather agree | **7,789**** | **9,627**** | **11,283**** | **10,502**** |
| Environmental awareness (ref. rather low) |  |  |  |  |
| middle | 0,944 | 0,89 | 1,237 | 1,192 |
| rather high | 1,59 | 1,256 | 1,45 | **1,706** |
| Highest formal education (ref. ISCED 0-2) |  |  |  |  |
| ISCED 3-4 | **2,013*** | 1,541 | 1,27 | 1,376 |
| ISCED 5-8 | 1,754 | **1,853** | 1,104 | 1,498 |
| Gender (ref. male) |  |  |  |  |
| female | 1,206 | 1,017 | 1,311 | 1,358 |
| Age (ref. < 30) |  |  |  |  |
| 30-44 | 0,821 | 1,247 | **1,701*** | 0,835 |
| 45-64 | 1,066 | 1,088 | **1,623*** | 0,652 |
| 65+ | 0,964 | 1,182 | 1,536 | **0,565** |
|  |  |  |  |  |
| X2/df/p | 94.928 / 11 / <.001 | 150.170 / 11 / <.001 | 178.860 / 11 / <.001 | 120.569 / 11 / <.001 |
| Nagelkerkes R2 | 0.174 | 0.223 | 0.263 | 0.195 |
| Hosmer-Lemeshow | *p =* 0.070 | *p =* 0.132 | *p =* 0.263 | *p =* 0.881 |
| n | 1.001 | 1.001 | 1.001 | 1.001 |
| Note: Values in bold are significant at p < 0.05; ** at p < 0.01; values in bold without * are significant at p < 0.1. | | | | |

**Table A.2 – Log Reg. – Share**

|  | **Strategy: Share** | | | |
| --- | --- | --- | --- | --- |
|  | **OR - clothes** | **OR - e. devices** | **OR - furniture** | **OR - toys** |
| Make ends meet (ref. Rather/very easy) |  |  |  |  |
| (some/great) difficulties | 1,106 | 1,108 | 1,209 | **1,325*** |
| Willingness (ref. rather disagree) |  |  |  |  |
| neither | 1,511 | **1,614*** | **2,59**** | **2,52**** |
| rather agree | **3,811**** | **3,537**** | **4,183**** | **2,983**** |
| Accessibility (re. rather low) |  |  |  |  |
| middle | **1,405*** | **1,762**** | 1,143 | **1,554**** |
| rather high | **1,826*** | **2,458**** | **2,306**** | **2,942**** |
| Environmental awareness (ref. rather low) |  |  |  |  |
| middle | 1,23 | 0,631 | 0,87 | 1,067 |
| rather high | 1,147 | 0,681 | 0,761 | 1,167 |
| Highest formal education (ref. ISCED 0-2) |  |  |  |  |
| ISCED 3-4 | 0,822 | **1,386** | 0,875 | 0,982 |
| ISCED 5-8 | 0,862 | **1,509** | 0,82 | 1,027 |
| Gender (ref. male) |  |  |  |  |
| female | 0,852 | **0,77** | 0,853 | 0,831 |
| Age (ref. < 30) |  |  |  |  |
| 30-44 | 0,825 | **0,668** | 0,814 | 0,846 |
| 45-64 | **0,646*** | **0,648*** | 0,829 | 0,932 |
| 65+ | 0,975 | 1,114 | 1,203 | 1,197 |
|  |  |  |  |  |
| X2/df/p | 111.376 / 13 / <.001 | 130.403 / 13 / <.001 | 107.911 / 13 / <.001 | 118.455 / 13 / <.001 |
| Nagelkerkes R2 | 0.141 | 0.163 | 0.139 | 0.150 |
| Hosmer-Lemeshow | *p = 0.16* | *p = 0.545* | *p = 0.360* | *p = 0.314* |
| n | 1.001 | 1.001 | 1.001 | 1.001 |
| Note: Values in bold are significant at p < 0.05; ** at p < 0.01; values in bold without * are significant at p < 0.1. | | | | |

**Table A.3 – Log Reg. – Share**

|  | **Strategy: Second-Hand** | | | |
| --- | --- | --- | --- | --- |
|  | **OR - clothes** | **OR - e. devices** | **OR - furniture** | **OR - toys** |
| Make ends meet (ref. Rather/very easy) |  |  |  |  |
| (some/great) difficulties | **1,376*** | **1,394*** | 1,25 | **1,537**** |
| Willingness (ref. rather disagree) |  |  |  |  |
| neither | **2,979**** | **2,761**** | **2,422**** | **2,172**** |
| rather agree | **8,945**** | **6,355**** | **8,782**** | **4,327**** |
| Accessibility (re. rather low) |  |  |  |  |
| middle | **1,526*** | **1,52**** | **1,539*** | **1,56*** |
| rather high | **2,672**** | **3,178**** | **2,574**** | **2,293**** |
| Environmental awareness (ref. rather low) |  |  |  |  |
| middle | 1,084 | 1,003 | 0,557 | 0,86 |
| rather high | 0,861 | 0,855 | 0,666 | 0,759 |
| Highest formal education (ref. ISCED 0-2) |  |  |  |  |
| ISCED 3-4 | **1,696** | 1,363 | 1,414 | 1,292 |
| ISCED 5-8 | 1,357 | 1,472 | **1,946*** | 1,299 |
| Gender (ref. male) |  |  |  |  |
| female | 1,281 | 0,866 | 1,043 | 0,923 |
| Age (ref. < 30) |  |  |  |  |
| 30-44 | 1,133 | 0,961 | 1,168 | 1,051 |
| 45-64 | 1,119 | 0,933 | 0,969 | 1,083 |
| 65+ | 1,43 | 1,405 | 0,897 | 1,092 |
|  |  |  |  |  |
| X2/df/p | 267.462 / 13 / <.001 | 232.554 / 13 / <.001 | 256.515 / 13 / <.001 | 146.641 / 13 / <.001 |
| Nagelkerkes R2 | 0.322 | 0.283 | 0.313 | 0.187 |
| Hosmer-Lemeshow | *p = 0.141* | *p = 0.558* | *p = 0.069* | *p = 0.082* |
| n | 1.001 | 1.001 | 1.001 | 1.001 |
| Note: Values in bold are significant at p < 0.05; ** at p < 0.01; values in bold without * are significant at p < 0.1. | | | | |

**Table A.3 – Log Reg. – Share**

|  | **Strategy: Repair** | | | |
| --- | --- | --- | --- | --- |
|  | **OR - clothes** | **OR - e. devices** | **OR - furniture** | **OR - toys** |
| Make ends meet (ref. Rather/very easy) |  |  |  |  |
| (some/great) difficulties | 1,007 | 0,894 | 1,161 | **1,481*** |
| Willingness (ref. rather disagree) |  |  |  |  |
| neither | **3,512**** | **3,229**** | **1,662*** | **3,188**** |
| rather agree | **11,449**** | **6,186**** | **6,485**** | **5,138**** |
| Accessibility (re. rather low) |  |  |  |  |
| middle | 1,007 | **1,907*** | **1,419** | 1,218 |
| rather high | **2,32**** | **2,807**** | **1,619** | **3,064*** |
| Environmental awareness (ref. rather low) |  |  |  |  |
| middle | 0,796 | 0,65 | 1,224 | 0,932 |
| rather high | 0,866 | 1,128 | 1,349 | 0,733 |
| Highest formal education (ref. ISCED 0-2) |  |  |  |  |
| ISCED 3-4 | 1,553 | **1,965*** | **1,706*** | 1,514 |
| ISCED 5-8 | **2,159*** | **1,813** | 1,372 | 1,542 |
| Gender (ref. male) |  |  |  |  |
| female | 1,246 | **1,426** | 1,281 | 0,924 |
| Age (ref. < 30) |  |  |  |  |
| 30-44 | 1,014 | **2,074*** | 0,923 | 0,815 |
| 45-64 | 1,184 | **2,081*** | 0,786 | 0,75 |
| 65+ | 1,471 | **1,81** | 0,794 | **0,565*** |
|  |  |  |  |  |
| X2/df/p | 251.381 / 13 / <.001 | 114.233 / 13 / <.001 | 152.296 / 13 / <.001 | 165.928 / 13 / <.001 |
| Nagelkerkes R2 | 0.325 | 0.194 | 0.211 | 0.210 |
| Hosmer-Lemeshow | *p = 0.255* | *p = 0.849* | *p = 0.491* | *p = 0.902* |
| n | 1.001 | 1.001 | 1.001 | 1.001 |
| Note: Values in bold are significant at p < 0.05; ** at p < 0.01; values in bold without * are significant at p < 0.1. | | | | |
